# Supplementary material for: Tiliacora triandra Leaf Powder Ethanolic Extract in Combination with Cisplatin or Gemcitabine Synergistically Inhibits the Growth of Cholangiocarcinoma Cells In Vitro and in Nude Mouse Xenograft Models
Source: MDPI journal article supplement (doi:10.3390/medicina59071269), 2023-07-07
Supplement: s1 [file s1]

# ***Tiliacora triandra* Leaf Powder Ethanolic Extract in Combination with Cisplatin or Gemcitabine Synergistically Inhibits the Growth of Cholangiocarcinoma Cells In Vitro and in Nude Mouse Xenograft Models**

Arunta Samankul <sup>1</sup>, Gulsiri Senawong <sup>1</sup>, Suppawit Utaiwat <sup>1</sup>, Jeerati Prompipak <sup>1</sup>, Khanutsanan Woranam <sup>1</sup>, Chanokbhorn Phaosiri <sup>2</sup>, Banchob Sripa <sup>3</sup> and Thanaset Senawong <sup>1,\*</sup>

<sup>1</sup> Department of Biochemistry, Faculty of Science, Khon Kaen University, Khon Kaen 40002, Thailand; s\_arunta@kkumail.com (A.S.); gulsiri@kku.ac.th (G.S.); u.suppawit@kkumail.com (S.U.); jeerati.ppk@kkumail.com (J.P.); khanutsanan\_w@kkumail.com (K.W.)

<sup>2</sup> Department of Chemistry, Faculty of Science, Khon Kaen University, Khon Kaen 40002, Thailand; chapha@kku.ac.th

<sup>3</sup> WHO Collaborating Centre for Research and Control of Opisthorchiasis (Southeast Asian Liver Fluke Disease), Tropical Disease Research Center, Faculty of Medicine, Khon Kaen University, Khon Kaen 40002, Thailand; banchob@kku.ac.th

\* Correspondence: sthanaset@kku.ac.th

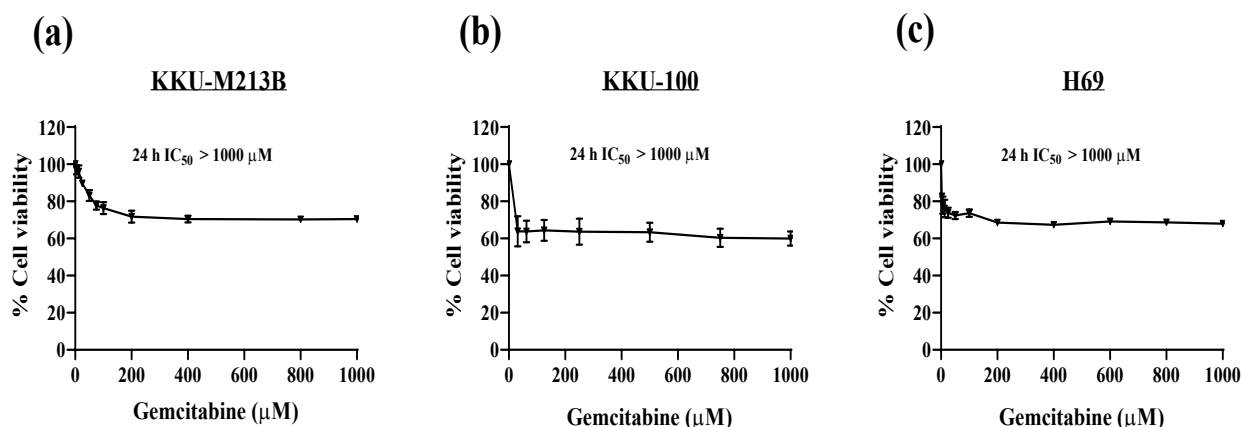

**Figure S1.** Antiproliferative effects of Gemcitabine against CCA cells at exposure time of 24 h. KKU-M213B (a), KKU-100 (b), and H69 (c) cells were treated with Gem for 24 h at the indicated concentrations.
